# Supplementary material
Source: MDPI journal article supplement (https://www.mdpi.com/1999-4907/11/8/841)
Supplement: s1 [file s1]

# Supplementary Information S1

**Supplementary information S1A.** Details of *Quercus ilex* stands used to select tolerant plants by researchers at the University of Extremadura (Uex).

| Taxon                                 | Location of population (population code)       | UTM coordinates<br>(WGS84) | Elevation (m a.s.l.) |
|---------------------------------------|------------------------------------------------|----------------------------|----------------------|
| <i>Q. ilex</i> ssp.<br><i>ballota</i> |                                                |                            |                      |
| PR9                                   | Braganza, Tras-os-Montes e Alto Douro, PT (BR) | 29T 0686788 4632672        | 638                  |
| <i>Q. ilex</i> ssp. <i>ilex</i>       |                                                |                            |                      |
| PR8                                   | Barrios de Bureba, Castile and León, ES (BB)   | 30T 0468560 4723457        | 662                  |
| PR6, PR11                             | Bagnaia, Lazio, IT (BG)                        | 33T 0265952 4700719        | 465                  |

<sup>a</sup> ISO country codes: ES, Spain; PT, Portugal; IT, Italy.

**Supplementary information S1B.** Distribution of *Q. ilex* ssp. *ballota* (black circles) and *Q. ilex* ssp. *ilex* (orange circles) populations used in this study: (BR) Braganza, Tras-os-Montes e Alto Douro, Portugal; (BB) Barrios de Bureba, Castile and León, Spain; (BG) Bagnaia, Lazio, Italy; (HU) Huelva, Spain.

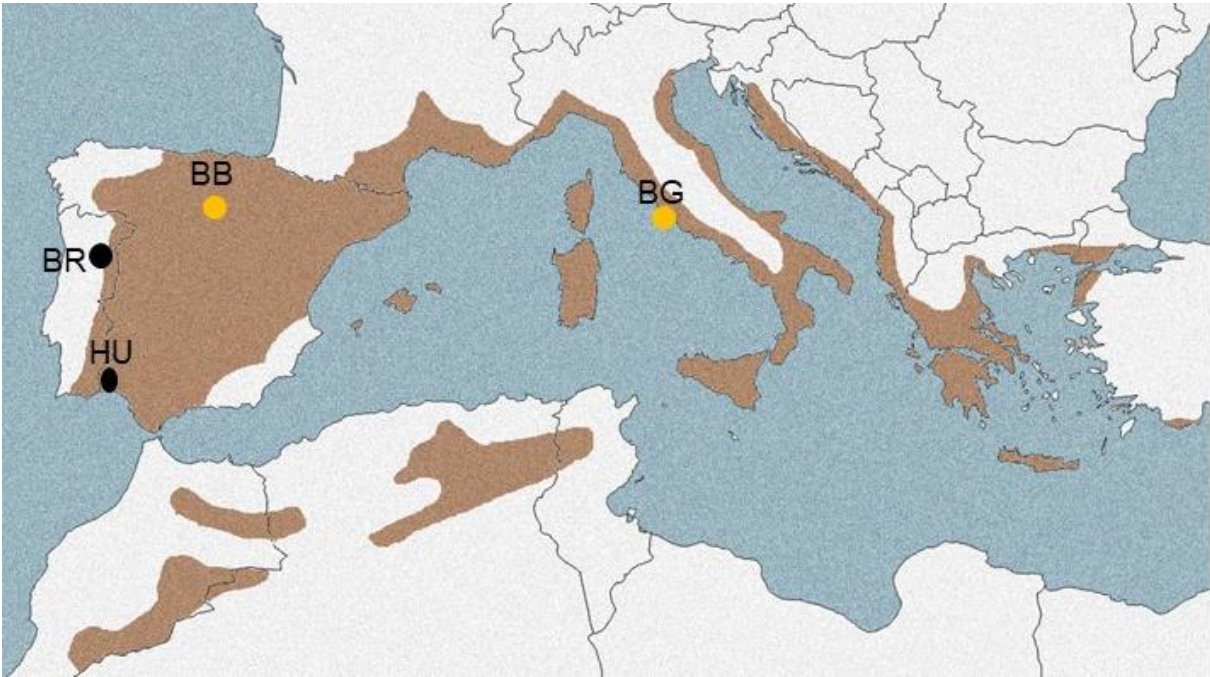

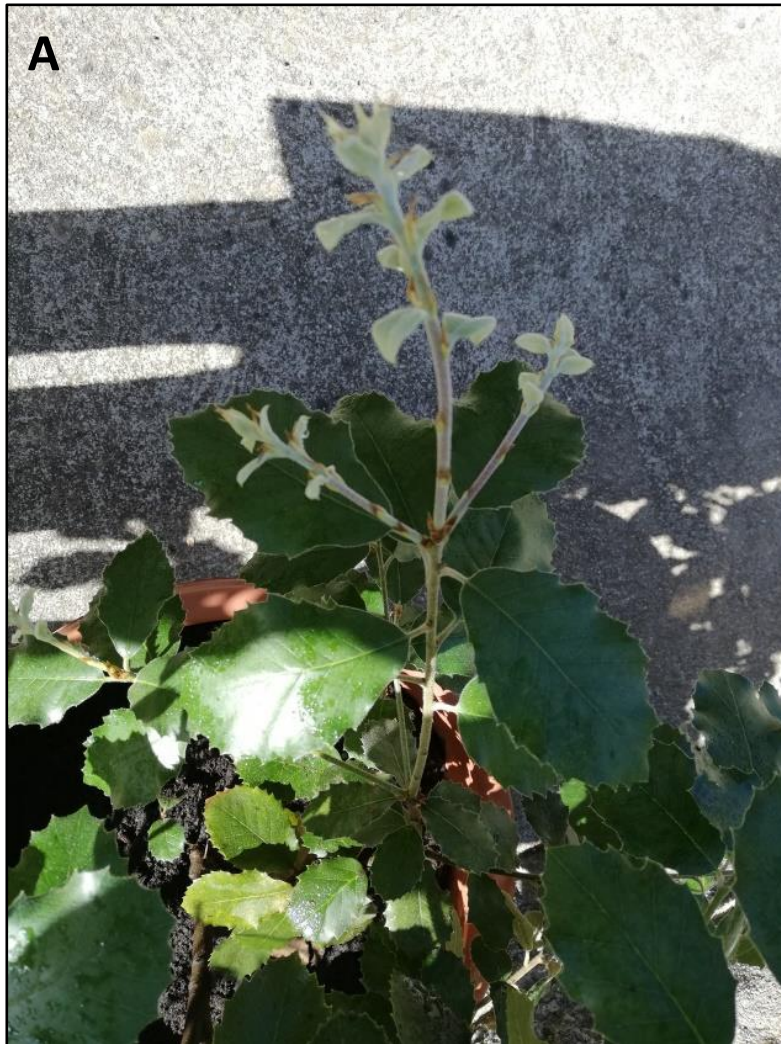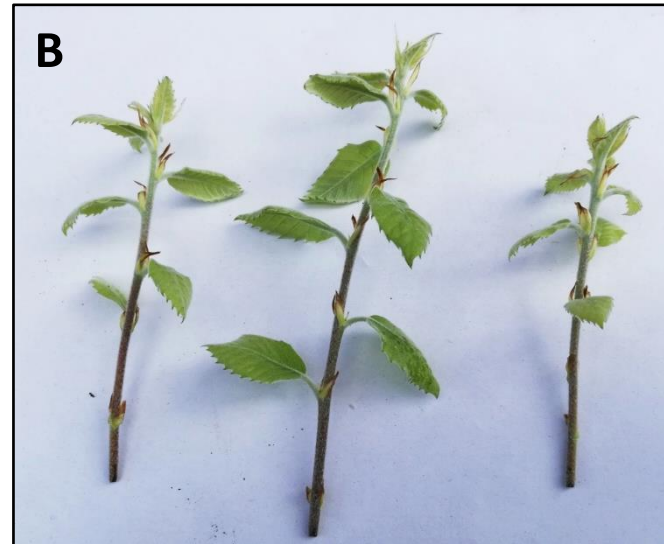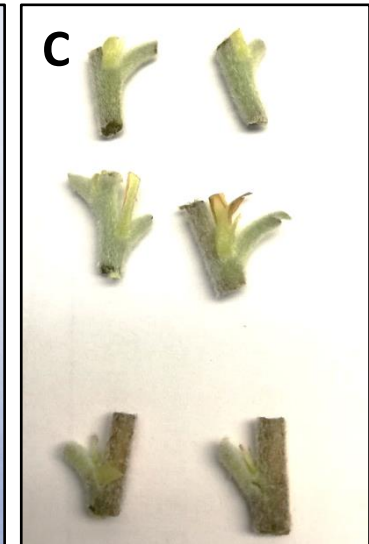

**Supplementary information S2.** Complementary information about establishment step. A. Flushed shoots obtained after culture of potted plants on growth chamber. B. Excised flushed shoots from plant showed in A. C. Nodal explants used as initial explants on in vitro culture and excised from shoots showed in B.

Supplementary information S3. Culture media used in the different steps of micropropagation by somatic embryogenesis and axillary shoot proliferation of holm oak.

| Components                                      | SE<br>induction | SE<br>proliferation | SE<br>germination | In vitro shoot<br>establishment | Axillary shoot<br>proliferation | Shoot rooting<br>induction <sup>1</sup> | Shoot root expression |
|-------------------------------------------------|-----------------|---------------------|-------------------|---------------------------------|---------------------------------|-----------------------------------------|-----------------------|
| Basal medium                                    | MS              | SH                  | GD                | WPM                             | WPM                             | 1/3GD                                   | 1/3GD                 |
| Casein hydrolyzate<br>(mg L <sup>-1</sup> )     | 500             | --                  | --                | --                              | --                              | --                                      | --                    |
| BA (mg L <sup>-1</sup> )                        | 0.5 or zero     | --                  | 0.1               | 0.2                             | 0.1 or 0.05                     | --                                      | --                    |
| IAA (mg L <sup>-1</sup> )                       | 4 or zero       | --                  | --                | --                              | --                              | --                                      | --                    |
| IBA (mg L <sup>-1</sup> )                       | --              | --                  | --                | --                              | --                              | 25                                      | --                    |
| Sucrose (g L <sup>-1</sup> )                    | 30              | 30                  | 30                | 30                              | 30                              | 30                                      | 30                    |
| Ascorbic acid (g L <sup>-1</sup> ) <sup>2</sup> | --              | --                  | --                | 80                              | --                              | --                                      | --                    |
| STS (μM) <sup>2</sup>                           | --              | --                  | 20                | --                              | 20                              | --                                      | 20                    |
| Vitro Agar (g L <sup>-1</sup> )                 | 6               | 6                   | 6                 | 7                               | --                              | 6                                       | 6                     |
| Sigma Agar (g L <sup>-1</sup> )                 | --              | --                  | --                | --                              | 8                               | --                                      | --                    |

BA, 6-benzyladenine; GD, Gresshoff and Doy; 1/3 GD, GD with 1/3 macronutrients; IAA, indole-acetic acid; IBA, indole-3-butyric acid; MS, Murashige and Skoog; SE, somatic embryos; SH, Schenk and Hildebrandt; STS, silver thiosulphate

<sup>1</sup>After 24-48 h in rooting medium, shoots were transferred to shoot root expression medium.

<sup>2</sup>This compound was filter-sterilized before being added to the autoclaved medium.
